# Supplementary material for: Characterization of the Giardia intestinalis secretome during interaction with human intestinal epithelial cells: The impact on host cells
Source: PLoS Negl Trop Dis. 2017 Dec 11;11(12):e0006120. doi: 10.1371/journal.pntd.0006120 (PMC5739509; doi:10.1371/journal.pntd.0006120)
Supplement: S9 Table — Proteins are listed in columns with headings indicating the time point they were detected. (XLSX) [file pntd.0006120.s012.xlsx]

## Sheet: S9 Table
S9 Table. Secreted proteins of the differentiated human colonic epithelial cell line, Caco2, incubated alone or with Giardia intestinalis WB isolate in a serum-free medium. Proteins are listed in columns with headings indicating the time point they were detected.
2h		Both time points		6h
Accession	Description	Accession	Description	Accession	Description
Q9BR76	Coronin-1B	Q9Y624	Junctional adhesion molecule A	Q9Y547	Intraflagellar transport protein 25 homolog
Q8WZ42	Titin	Q9Y5Z4	Heme-binding protein 2	Q9Y3B8	Oligoribonuclease, mitochondrial
Q68D85	Natural cytotoxicity triggering receptor 3 ligand 1	Q9Y4L1	Hypoxia up-regulated protein 1	Q9UL46	Proteasome activator complex subunit 2
P47755	F-actin-capping protein subunit alpha-2	Q9Y2T3	Guanine deaminase	Q9NZ08	Endoplasmic reticulum aminopeptidase 1
P37837	Transaldolase	Q9Y2B0	Protein canopy homolog 2	Q9NQW7	Xaa-Pro aminopeptidase 1
P31151	Protein S100-A7	Q9UNN8	Endothelial protein C receptor	Q9NQR4	Omega-amidase NIT2
P30039	Phenazine biosynthesis-like domain-containing protein	Q9UMX5	Neudesin	Q9NPR2	Semaphorin-4B
P08779	Keratin, type I cytoskeletal 16	Q9ULV4	Coronin-1C	Q9NZP8	Complement C1r subcomponent-like protein
P04040	Catalase	Q9UHL4	Dipeptidyl peptidase 2	Q9H3G5	Probable serine carboxypeptidase CPVL
P04004	Vitronectin	Q9UGT4	Sushi domain-containing protein 2	Q9BYE9	Cadherin-related family member 2
P02538	Keratin, type II cytoskeletal 6A	Q9UBR2	Cathepsin Z	Q9BRK5	45 kDa calcium-binding protein
P02533	Keratin, type I cytoskeletal 14	Q9NY33	Dipeptidyl peptidase 3	Q9BRF8	Serine/threonine-protein phosphatase CPPED1
P00995	Pancreatic secretory trypsin inhibitor	Q9NPH2	Inositol-3-phosphate synthase 1	Q9BQT9	Calsyntenin-3
O95881	Thioredoxin domain-containing protein 12	Q9HC38	Glyoxalase domain-containing protein 4	Q99497	Protein deglycase DJ-1
		Q9HBB8	Cadherin-related family member 5	Q99436	Proteasome subunit beta type-7
		Q9HAT2	Sialate O-acetylesterase	Q92673	Sortilin-related receptor
		Q9NVS9	Pyridoxine-5'-phosphate oxidase	Q8NCL4	Polypeptide N-acetylgalactosaminyltransferase 6
		Q9H4A4	Aminopeptidase B	Q86SQ4	G-protein coupled receptor 126
		Q9H477	Ribokinase	Q6UWW8	Carboxylesterase 3
		Q9H3R2	Mucin-13	Q16851	UTP--glucose-1-phosphate uridylyltransferase
		Q9BYF1	Angiotensin-converting enzyme 2	Q15582	Transforming growth factor-beta-induced protein ig-h3
		Q9BY67	Cell adhesion molecule 1	Q15293	Reticulocalbin-1
		Q9BTY2	Plasma alpha-L-fucosidase	Q15274	Nicotinate-nucleotide pyrophosphorylase [carboxylating]
		Q9BQS7	Hephaestin	Q15223	Nectin-1
		Q99519	Sialidase-1	Q15181	Inorganic pyrophosphatase
		Q96KP4	Cytosolic non-specific dipeptidase	Q14697	Neutral alpha-glucosidase AB
		Q96C23	Aldose 1-epimerase	Q14353	Guanidinoacetate N-methyltransferase
		Q969H8	Myeloid-derived growth factor	Q14118	Dystroglycan
		Q92823	Neuronal cell adhesion molecule	Q08623	Pseudouridine-5'-phosphatase
		Q92820	Gamma-glutamyl hydrolase	Q08431	Lactadherin
		Q92542	Nicastrin	Q08174	Protocadherin-1
		Q92520	Protein FAM3C	Q07954	Prolow-density lipoprotein receptor-related protein 1
		Q92484	Acid sphingomyelinase-like phosphodiesterase 3a	Q06481	Amyloid-like protein 2
		Q8WVQ1	Soluble calcium-activated nucleotidase 1	Q03403	Trefoil factor 2
		Q8NHP8	Putative phospholipase B-like 2	Q01082	Spectrin beta chain, non-erythrocytic 1
		Q6XQN6	Nicotinate phosphoribosyltransferase	P83916	Chromobox protein homolog 1
		Q6UWV6	Ectonucleotide pyrophosphatase/phosphodiesterase family member 7	P80303	Nucleobindin-2
		Q685J3	Mucin-17	P78417	Glutathione S-transferase omega-1
		Q5JS37	NHL repeat-containing protein 3	P68036	Ubiquitin-conjugating enzyme E2 L3
		Q16819	Meprin A subunit alpha	P62258	14-3-3 protein epsilon
		Q16651	Prostasin	P54802	Alpha-N-acetylglucosaminidase
		Q16531	DNA damage-binding protein 1	P54317	Pancreatic lipase-related protein 2
		Q15262	Receptor-type tyrosine-protein phosphatase kappa	P52907	F-actin-capping protein subunit alpha-1
		Q14126	Desmoglein-2	P50395	Rab GDP dissociation inhibitor beta
		Q14019	Coactosin-like protein	P50120	Retinol-binding protein 2
		Q13907	Isopentenyl-diphosphate Delta-isomerase 1	P48163	NADP-dependent malic enzyme
		Q13867	Bleomycin hydrolase	P46109	Crk-like protein
		Q13813	Spectrin alpha chain, non-erythrocytic 1	P42785	Lysosomal Pro-X carboxypeptidase
		Q13228	Selenium-binding protein 1	P42330	Aldo-keto reductase family 1 member C3
		Q12907	Vesicular integral-membrane protein VIP36	P42126	Enoyl-CoA delta isomerase 1, mitochondrial
		Q12864	Cadherin-17	P36871	Phosphoglucomutase-1
		Q12765	Secernin-1	P35754	Glutaredoxin-1
		Q08380	Galectin-3-binding protein	P34059	N-acetylgalactosamine-6-sulfatase
		Q08345	Epithelial discoidin domain-containing receptor 1	P33908	Mannosyl-oligosaccharide 1,2-alpha-mannosidase IA
		Q07654	Trefoil factor 3	P30101	Protein disulfide-isomerase A3
		Q06830	Peroxiredoxin-1	P30044	Peroxiredoxin-5, mitochondrial
		Q03154	Aminoacylase-1	P28838	Cytosol aminopeptidase
		Q02818	Nucleobindin-1	P28066	Proteasome subunit alpha type-5
		Q02487	Desmocollin-2	P25787	Proteasome subunit alpha type-2
		Q01518	Adenylyl cyclase-associated protein 1	P21399	Cytoplasmic aconitate hydratase
		Q01459	Di-N-acetylchitobiase	P20849	Collagen alpha-1(IX) chain
		P84103	Serine/arginine-rich splicing factor 3	P20827	Ephrin-A1
		P78324	Tyrosine-protein phosphatase non-receptor type substrate 1	P17900	Ganglioside GM2 activator
		P68104	Elongation factor 1-alpha 1	P16444	Dipeptidase 1
		P68032	Actin, alpha cardiac muscle 1	P16422	Epithelial cell adhesion molecule
		P63104	14-3-3 protein zeta/delta	P15328	Folate receptor alpha
		P62942	Peptidyl-prolyl cis-trans isomerase FKBP1A	P15311	Ezrin
		P62937	Peptidyl-prolyl cis-trans isomerase A	P14314	Glucosidase 2 subunit beta
		P62158	Calmodulin	P13284	Gamma-interferon-inducible lysosomal thiol reductase
		P61970	Nuclear transport factor 2	P12814	Alpha-actinin-1
		P61916	Epididymal secretory protein E1	P10619	Lysosomal protective protein
		P61769	Beta-2-microglobulin	P08697	Alpha-2-antiplasmin
		P61604	10 kDa heat shock protein, mitochondrial	P08238	Heat shock protein HSP 90-beta
		P60709	Actin, cytoplasmic 1	P08195	4F2 cell-surface antigen heavy chain
		P60174	Triosephosphate isomerase	P08174	Complement decay-accelerating factor
		P56537	Eukaryotic translation initiation factor 6	P07954	Fumarate hydratase, mitochondrial
		P55786	Puromycin-sensitive aminopeptidase	P07858	Cathepsin B
		P53634	Dipeptidyl peptidase 1	P07355	Annexin A2
		P50895	Basal cell adhesion molecule	P07225	Vitamin K-dependent protein S
		P48637	Glutathione synthetase	P05783	Keratin, type I cytoskeletal 18
		P48052	Carboxypeptidase A2	P04083	Annexin A1
		P43251	Biotinidase	P02763	Alpha-1-acid glycoprotein 1
		P37802	Transgelin-2	P02750	Leucine-rich alpha-2-glycoprotein
		P35908	Keratin, type II cytoskeletal 2 epidermal	P02749	Beta-2-glycoprotein 1
		P35527	Keratin, type I cytoskeletal 9	P02679	Fibrinogen gamma chain
		P35237	Serpin B6	P02671	Fibrinogen alpha chain
		P34932	Heat shock 70 kDa protein 4	P00751	Complement factor B
		P32119	Peroxiredoxin-2	P00505	Aspartate aminotransferase, mitochondrial
		P31949	Protein S100-A11	P00338	L-lactate dehydrogenase A chain
		P30740	Leukocyte elastase inhibitor	O95865	N(G),N(G)-dimethylarginine dimethylaminohydrolase 2
		P30086	Phosphatidylethanolamine-binding protein 1	O75976	Carboxypeptidase D
		P30048	Thioredoxin-dependent peroxide reductase, mitochondrial	O75369	Filamin-B
		P30047	GTP cyclohydrolase 1 feedback regulatory protein	O60494	Cubilin
		P30041	Peroxiredoxin-6	O15118	Niemann-Pick C1 protein
		P29401	Transketolase	O15031	Plexin-B2
		P27797	Calreticulin	O00754	Lysosomal alpha-mannosidase
		P27487	Dipeptidyl peptidase 4	O00462	Beta-mannosidase
		P25311	Zinc-alpha-2-glycoprotein
		P24855	Deoxyribonuclease-1
		P23528	Cofilin-1
		P23141	Liver carboxylesterase 1
		P22061	Protein-L-isoaspartate(D-aspartate) O-methyltransferase
		P20810	Calpastatin
		P19338	Nucleolin
		P19021	Peptidyl-glycine alpha-amidating monooxygenase
		P18669	Phosphoglycerate mutase 1
		P17174	Aspartate aminotransferase, cytoplasmic
		P17050	Alpha-N-acetylgalactosaminidase
		P16278	Beta-galactosidase
		P15586	N-acetylglucosamine-6-sulfatase
		P15289	Arylsulfatase A
		P15144	Aminopeptidase N
		P14618	Pyruvate kinase PKM
		P14410	Sucrase-isomaltase, intestinal
		P13796	Plastin-2
		P13693	Translationally-controlled tumor protein
		P13647	Keratin, type II cytoskeletal 5
		P13645	Keratin, type I cytoskeletal 10
		P13473	Lysosome-associated membrane glycoprotein 2
		P12955	Xaa-Pro dipeptidase
		P12830	Cadherin-1
		P12821	Angiotensin-converting enzyme
		P12429	Annexin A3
		P12277	Creatine kinase B-type
		P12109	Collagen alpha-1(VI) chain
		P11142	Heat shock cognate 71 kDa protein
		P11021	78 kDa glucose-regulated protein
		P10809	60 kDa heat shock protein, mitochondrial
		P10696	Alkaline phosphatase, placental-like
		P10599	Thioredoxin
		P10253	Lysosomal alpha-glucosidase
		P09960	Leukotriene A-4 hydrolase
		P09923	Intestinal-type alkaline phosphatase
		P09651	Heterogeneous nuclear ribonucleoprotein A1
		P09525	Annexin A4
		P09486	SPARC
		P09211	Glutathione S-transferase P
		P09104	Gamma-enolase
		P08758	Annexin A5
		P08727	Keratin, type I cytoskeletal 19
		P08582	Melanotransferrin
		P08263	Glutathione S-transferase A1
		P08107	Heat shock 70 kDa protein 1A/1B
		P07711	Cathepsin L1
		P07686	Beta-hexosaminidase subunit beta
		P07602	Prosaposin
		P07339	Cathepsin D
		P07237	Protein disulfide-isomerase
		P07148	Fatty acid-binding protein, liver
		P07108	Acyl-CoA-binding protein
		P06865	Beta-hexosaminidase subunit alpha
		P06748	Nucleophosmin
		P06744	Glucose-6-phosphate isomerase
		P06733	Alpha-enolase
		P06727	Apolipoprotein A-IV
		P06396	Gelsolin
		P05787	Keratin, type II cytoskeletal 8
		P05090	Apolipoprotein D
		P04424	Argininosuccinate lyase
		P04406	Glyceraldehyde-3-phosphate dehydrogenase
		P04264	Keratin, type II cytoskeletal 1
		P04181	Ornithine aminotransferase, mitochondrial
		P04179	Superoxide dismutase [Mn], mitochondrial
		P04066	Tissue alpha-L-fucosidase
		P02771	Alpha-fetoprotein
		P02768	Serum albumin
		P02766	Transthyretin
		P02765	Alpha-2-HS-glycoprotein
		P02753	Retinol-binding protein 4
		P02675	Fibrinogen beta chain
		P02649	Apolipoprotein E
		P02647	Apolipoprotein A-I
		P01042	Kininogen-1
		P01037	Cystatin-SN
		P01034	Cystatin-C
		P01019	Angiotensinogen
		P01009	Alpha-1-antitrypsin
		P00558	Phosphoglycerate kinase 1
		P00491	Purine nucleoside phosphorylase
		P00441	Superoxide dismutase [Cu-Zn]
		O95994	Anterior gradient protein 2 homolog
		O95336	6-phosphogluconolactonase
		O94919	Endonuclease domain-containing 1 protein
		O94760	N(G),N(G)-dimethylarginine dimethylaminohydrolase 1
		O75882	Attractin
		O75874	Isocitrate dehydrogenase [NADP] cytoplasmic
		O75629	Protein CREG1
		O75223	Gamma-glutamylcyclotransferase
		O60888	Protein CutA
		O60664	Perilipin-3
		O43895	Xaa-Pro aminopeptidase 2
		O43852	Calumenin
		O43707	Alpha-actinin-4
		O14773	Tripeptidyl-peptidase 1
		O00764	Pyridoxal kinase
		O00584	Ribonuclease T2
		O00299	Chloride intracellular channel protein 1
